# Supplementary material
Source: Springer Nature journal article supplement (https://www.springermedizin.de/resource/supplementary/12943_2012_1016_MOESM6_ESM.pdf/9552126)

**A**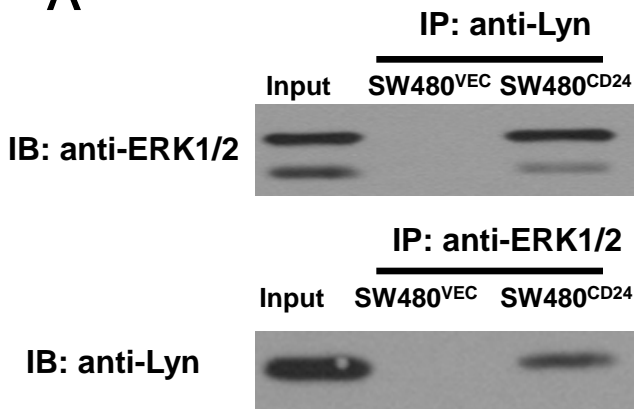**B**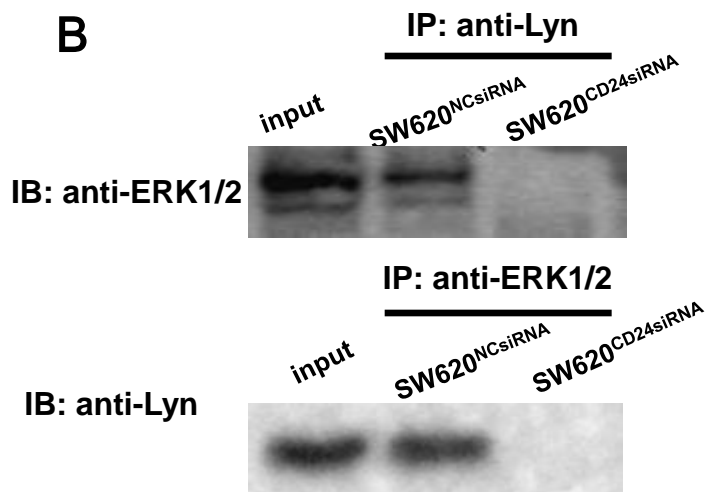**C**

Lyn

ERK1/2

DAPI

Merge

pcDNA3.1(+)

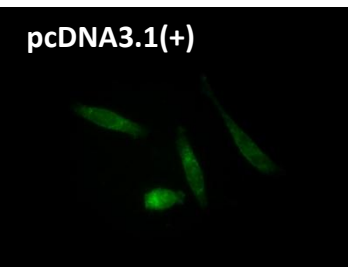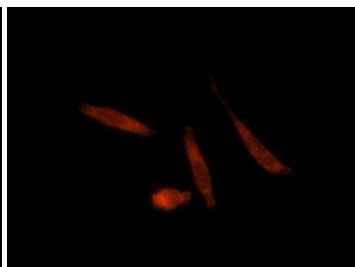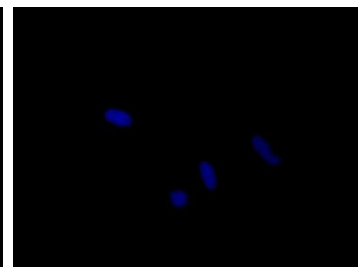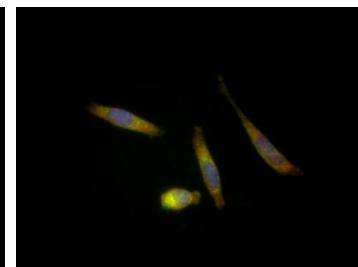

pcDNA3.1(+)-CD24

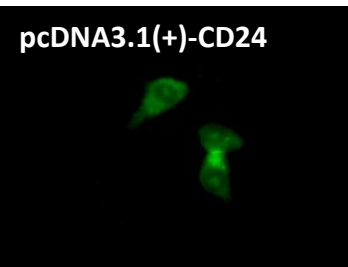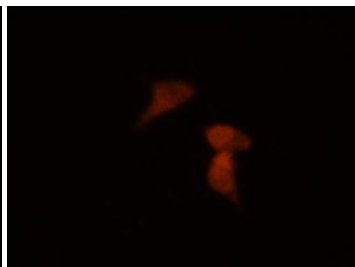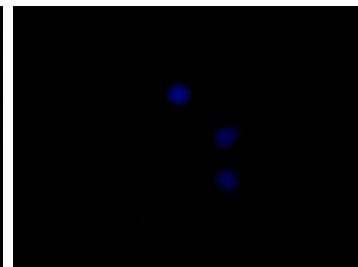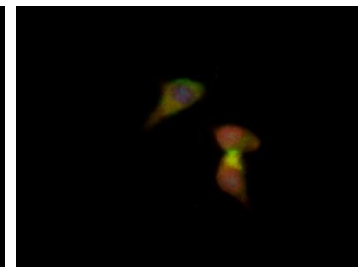

Supplement: MOESM6 [file 9552126]
